# Supplementary material for: In situ-generated metal oxide catalyst during CO oxidation reaction transformed from redox-active metal-organic framework-supported palladium nanoparticles
Source: PubMed Central journal article supplement (PMC3492126; doi:10.1186/1556-276x-7-461), 2012-08-17
Supplement: 1556-276X-7-461-S1.pdf [file 1556-276X-7-461-S1.pdf]

## Supporting Information

# ***In situ*-generated metal oxide catalyst during CO oxidation reaction transformed from redox-active metal-organic framework supported palladium nanoparticles**

Jin Yeong Kim,<sup>a</sup> Mingshi Jin,<sup>b</sup> Kyung Joo Lee,<sup>a</sup> Jae Yeong Cheon,<sup>c</sup> Sang Hoon Joo,<sup>c\*</sup> Ji Man Kim,<sup>b\*</sup> and Hoi Ri Moon<sup>a\*</sup>

<sup>a</sup> Interdisciplinary School of Green Energy, Ulsan National Institute of Science and Technology (UNIST), Ulsan 689-798, Republic of Korea. E-mail: [hoirimoon@unist.ac.kr](mailto:hoirimoon@unist.ac.kr)

Fax: +82-52-217-2019; Tel: +82-52-217-2928

<sup>b</sup> Department of Chemistry, BK21 School of Chemical Materials Science and Department of Energy Science, Sungkyunkwan University, Suwon 440-746, Republic of Korea. E-mail: [jimankim@skku.edu](mailto:jimankim@skku.edu)

Fax: +82-31-290-7075; Tel: +82-31-290-7074

<sup>c</sup> School of Nano-Bioscience and Chemical Engineering, Ulsan National Institute of Science and Technology (UNIST), Ulsan 689-798, Republic of Korea. E-mail: [shjoo@unist.ac.kr](mailto:shjoo@unist.ac.kr)

Fax: +82-52-217-2019; Tel: +82-52-217-2522

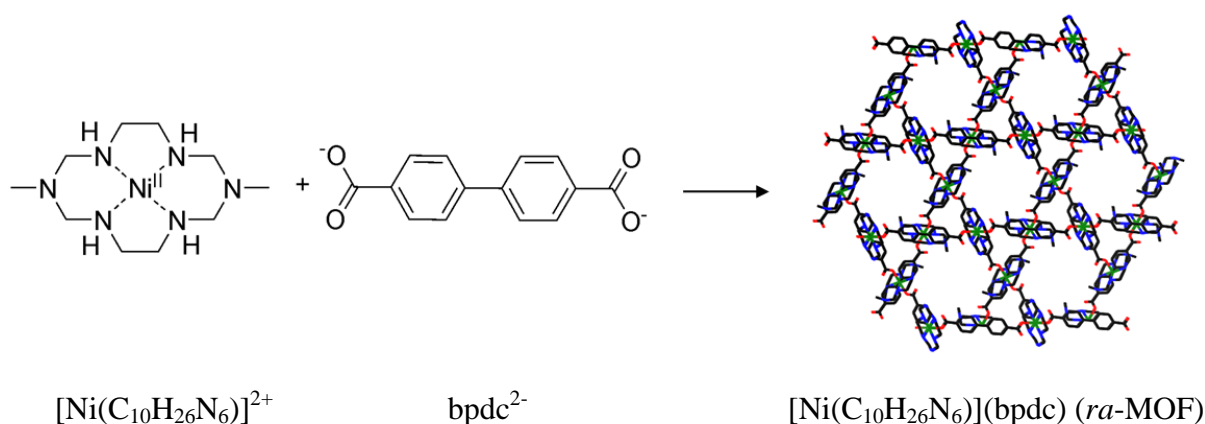

**Figure S1.** Synthetic scheme of *ra*-MOF by self-assembly of [Ni(C<sub>10</sub>H<sub>26</sub>N<sub>6</sub>)]<sup>2+</sup> and bpd<sup>2-</sup>

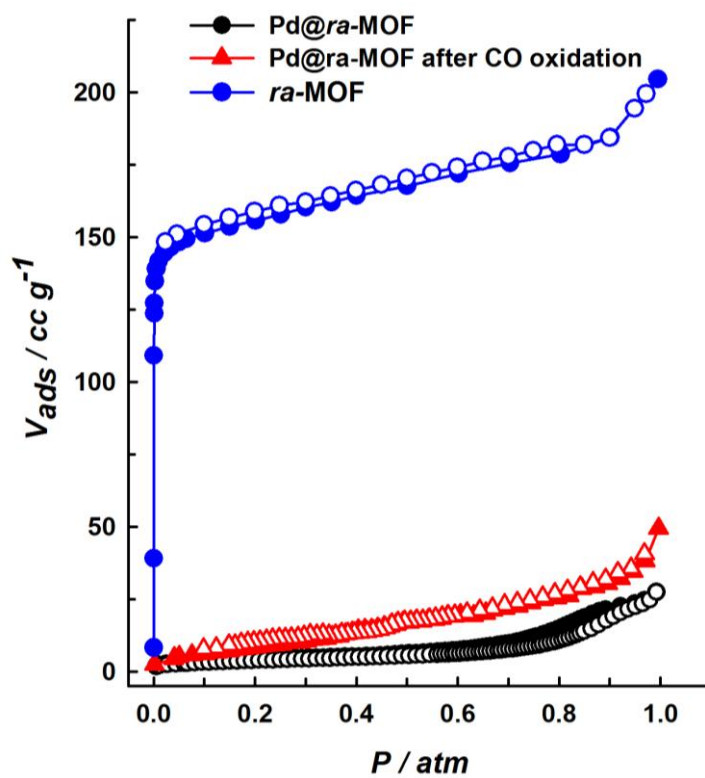

**Figure S2.** Comparison of N<sub>2</sub> sorption data for *ra*-MOF and Pd@*ra*-MOF before and after CO oxidation reaction

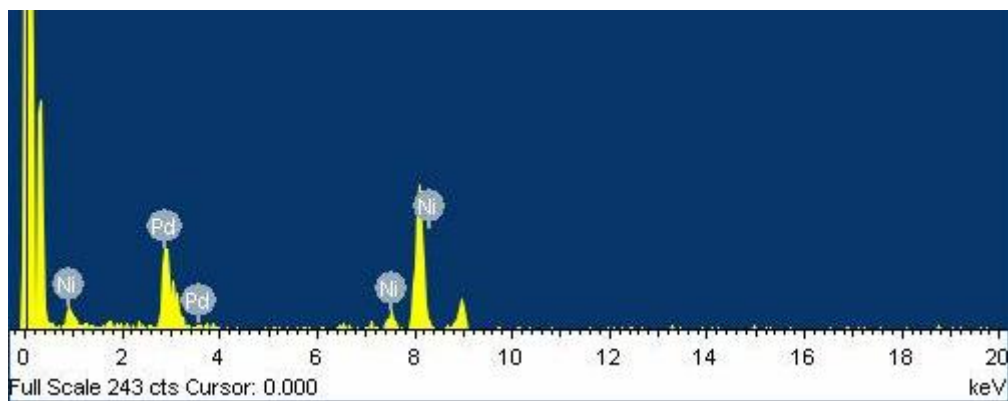

**Figure S3.** EDS result of Pd@*ra*-MOF

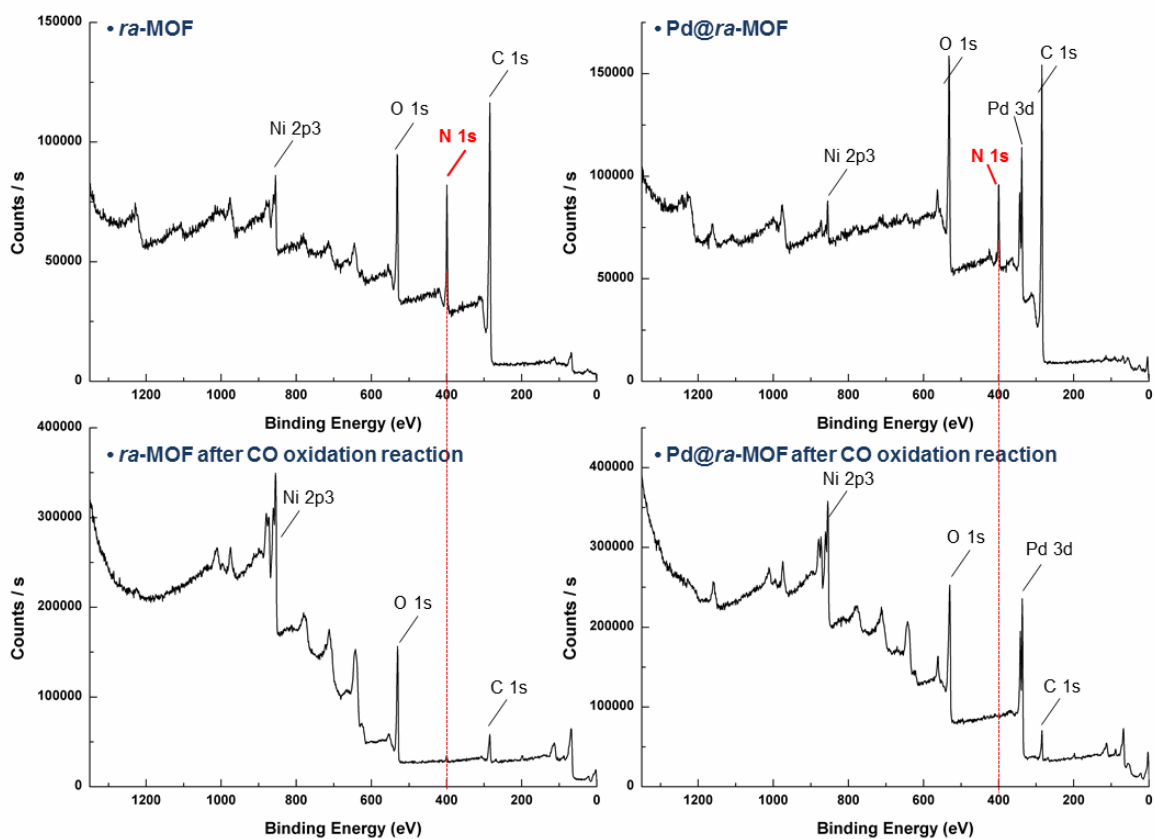

**Figure S4.** XPS wide scan spectra for *ra*-MOF and Pd@*ra*-MOF before and after CO oxidation reaction, respectively.

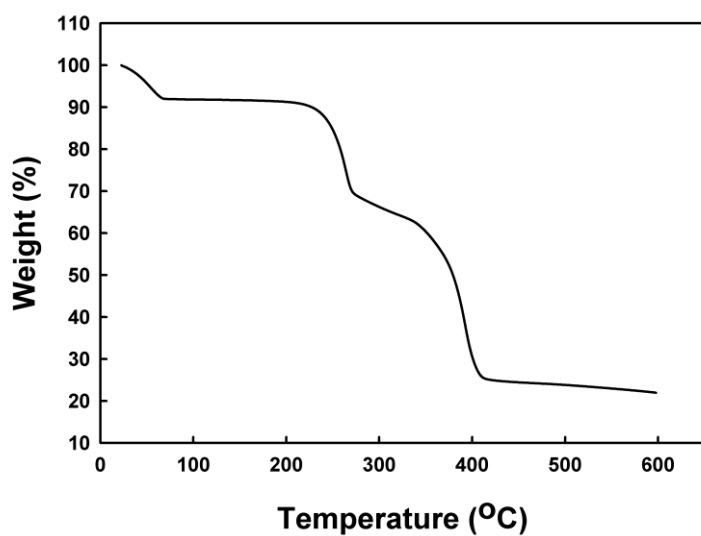

**Figure S5.** TGA trace of *ra*-MOF

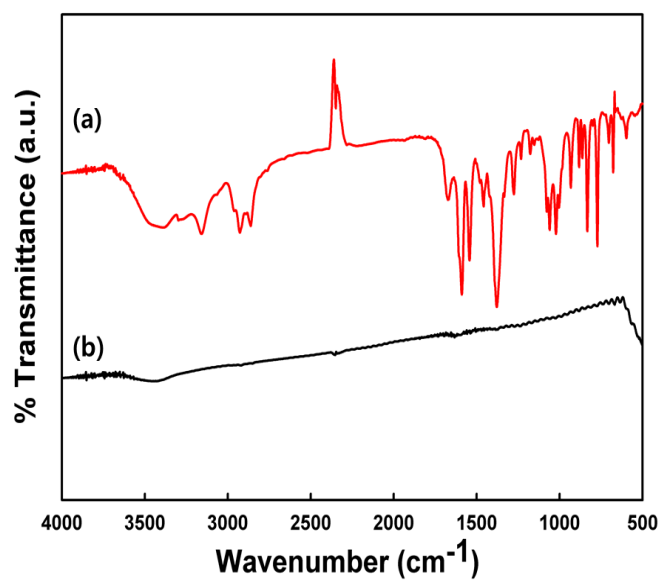

**Figure S6.** Comparison of IR spectra for *ra*-MOF (a) before and (b) after CO oxidation reaction upto 500 °C.

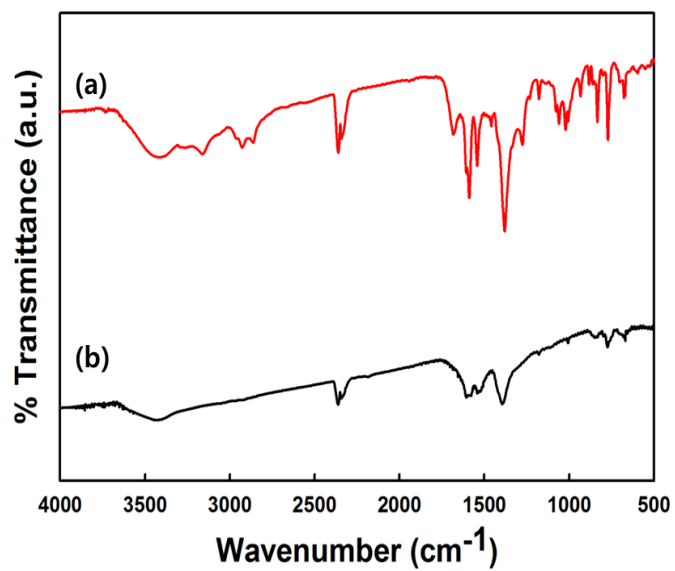

**Figure S7.** Comparison of IR spectra for Pd@*ra*-MOF (a) before and (b) after CO oxidation reaction upto 300 °C.
